# Supplementary material
Source: PubMed Central journal article supplement (PMC6151180)

## Supplementary Figures

### **Figure S1: Blood glucose levels after streptozotocin injection, before and after insulin pellet implantation (at the time of ischemia / sham surgery).**

Blood glucose levels measured for (1) ITD + sham (n = 8), (2) ITD + ischemia (n = 11), (3) ITD + RH + sham (n = 14), (4) ITD + RH + ischemia (n = 15), (5) ITD + RH + glucose + sham (n = 12), and (6) ITD + RH + glucose + ischemia (n = 14) after streptozotocin injection, before and after insulin pellet implantation (at the time of ischemia / sham surgery). The results are presented as mean  $\pm$  SEM.

### **Figure S2: Blood glucose levels, before, during, and after induction of hypoglycemia.**

Blood glucose levels measured for (1) ITD + RH + sham (n = 14), (2) ITD + RH + ischemia (n = 15), (3) ITD + RH + glucose + sham (n = 12), (4) ITD + RH + glucose + ischemia (n = 14) during hypoglycemia procedure at baseline (prior to hypoglycemia); at 1 hr, 2 hr, and 3 hr post-insulin injection (during hypoglycemia), and at the recovery phase (after hypoglycemia). The results are presented as mean  $\pm$  SEM.

### **Figure S3: The effect of cerebral ischemia on distance traveled and latency during the Barnes maze test.**

The distance traveled for naïve, ITD, ITD + RH, and ITD + RH + glucose groups subjected to sham or ischemia are presented in figures A, B, C, and D, respectively. The latency to find escape tunnel for naïve, ITD, ITD + RH, and ITD + RH + Glucose groups subjected to sham or ischemia are presented in figures E, F, G, and H, respectively. The groups include (1) naïve + sham (n = 9), (2) naïve + ischemia (n = 8), (3) ITD + sham (n = 7), (4) ITD + ischemia (n = 5), (5) ITD + RH + sham (n = 14), (6) ITD + RH + ischemia (n = 8), (7) ITD + RH + glucose + sham (n = 12), (8) ITD + RH + glucose + ischemia (n = 7). The results are presented as mean  $\pm$  SEM. A day (groups improved over time) effect ( $p < 0.01$  for distance and  $p < 0.005$  for latency), was observed among the four ischemia groups (naïve, ITD, ITD + RH, and ITD + RH + glucose) for these two parameters. The rates of learning (distance traveled) in ITD + ischemia ( $p < 0.05$ ) and ITD + RH + glucose +

ischemia ( $p < 0.05$ ) groups were significantly impaired when compared to the respective sham groups.

**Figure S4: The search strategy used during the Barnes maze test.**

The groups include (1) naïve + sham ( $n = 9$ ), (2) naïve + ischemia ( $n = 8$ ), (3) ITD + sham ( $n = 7$ ), (4) ITD + ischemia ( $n = 5$ ), (5) ITD + RH + sham ( $n = 14$ ), (6) ITD + RH + ischemia ( $n = 8$ ), (7) ITD + RH + glucose + sham ( $n = 12$ ), (8) ITD + RH + glucose + ischemia ( $n = 7$ ). The results are presented as mean  $\pm$  SEM.

Figure S1

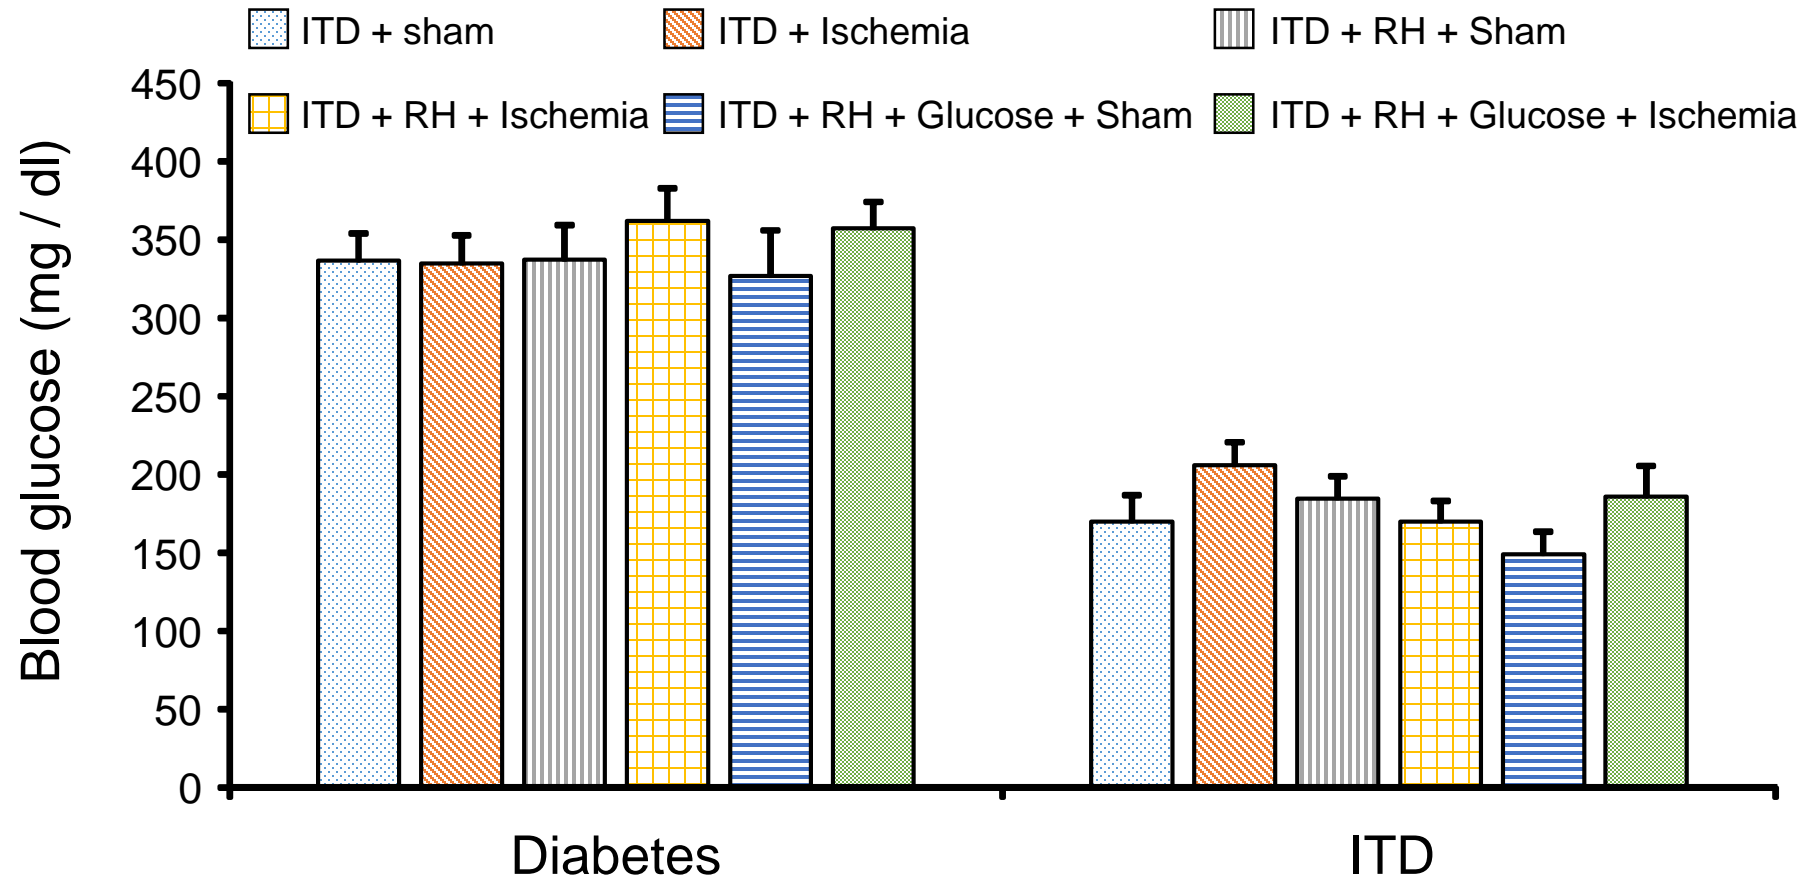

Figure S2

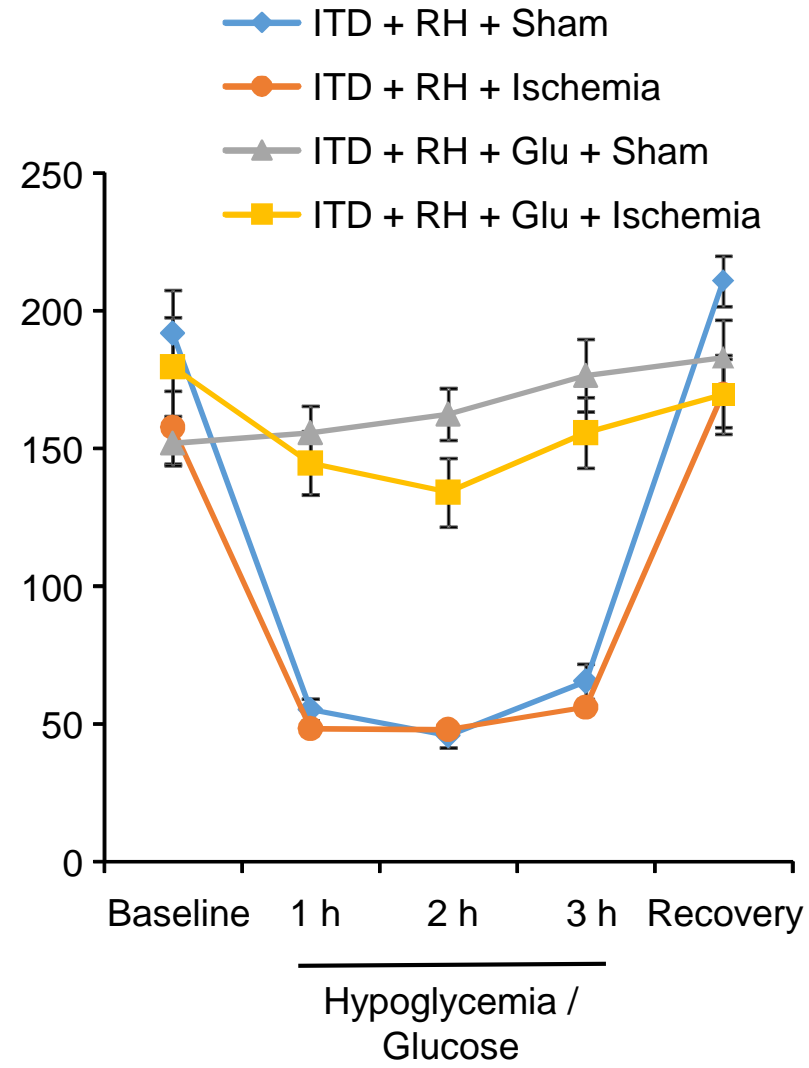

Figure S3

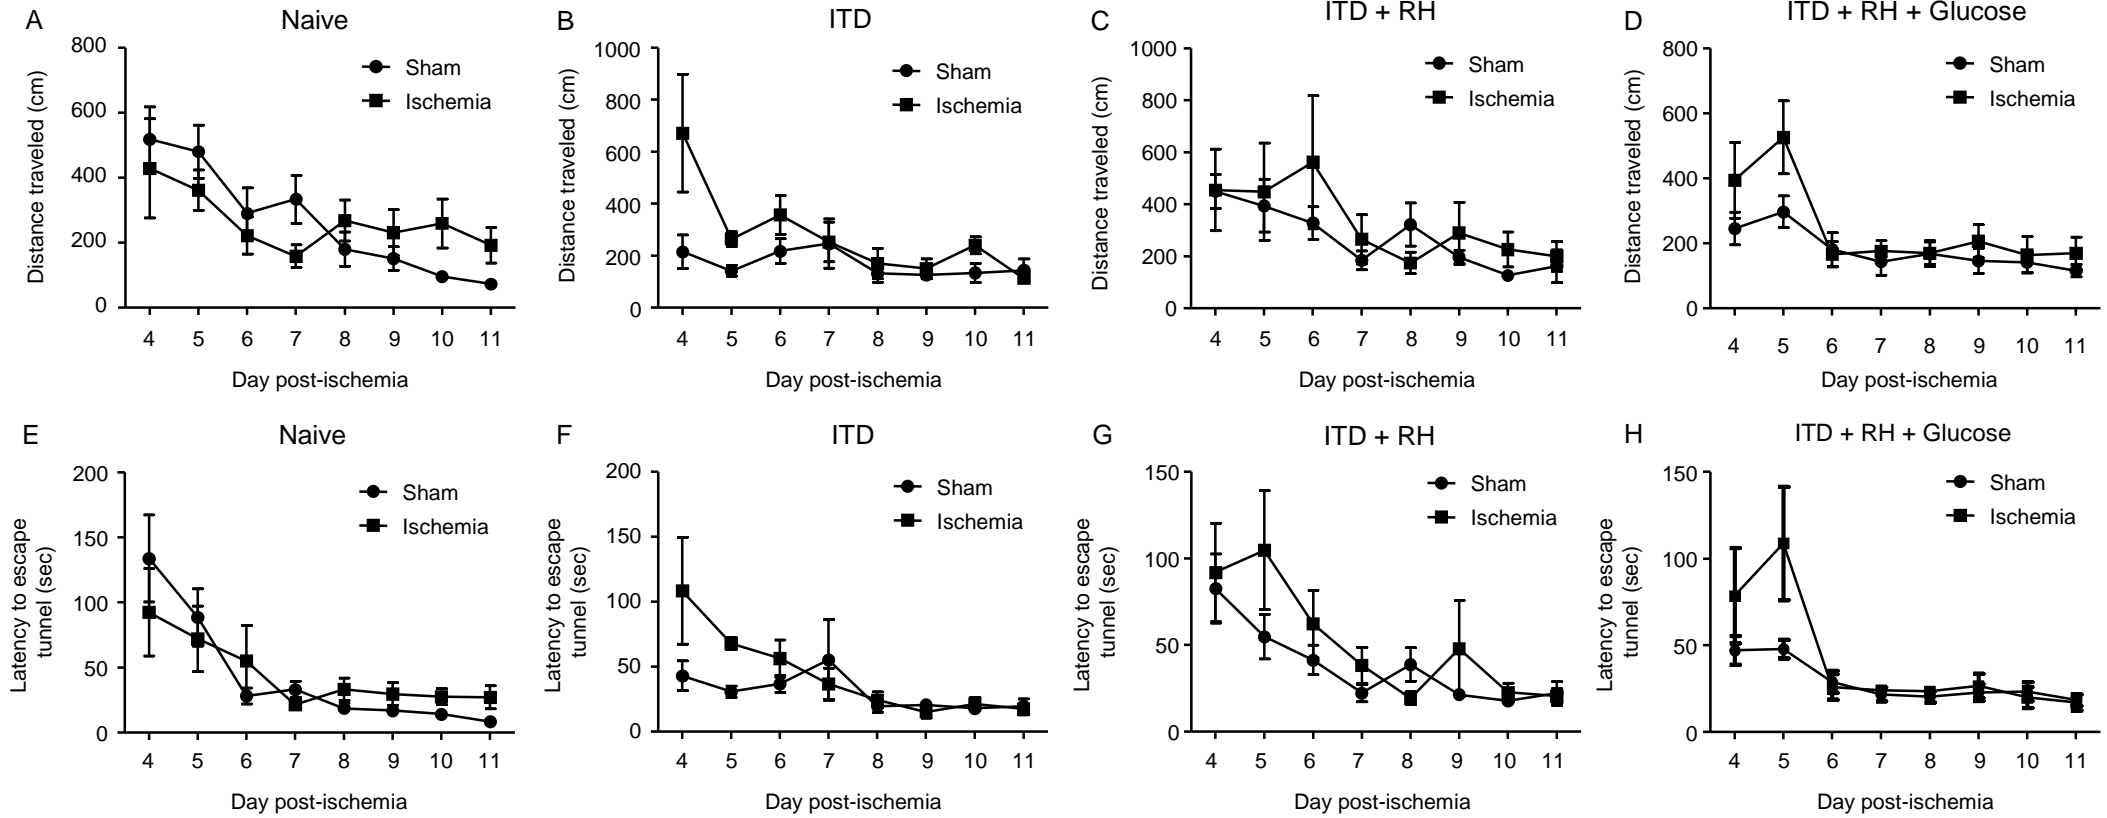

Figure S4

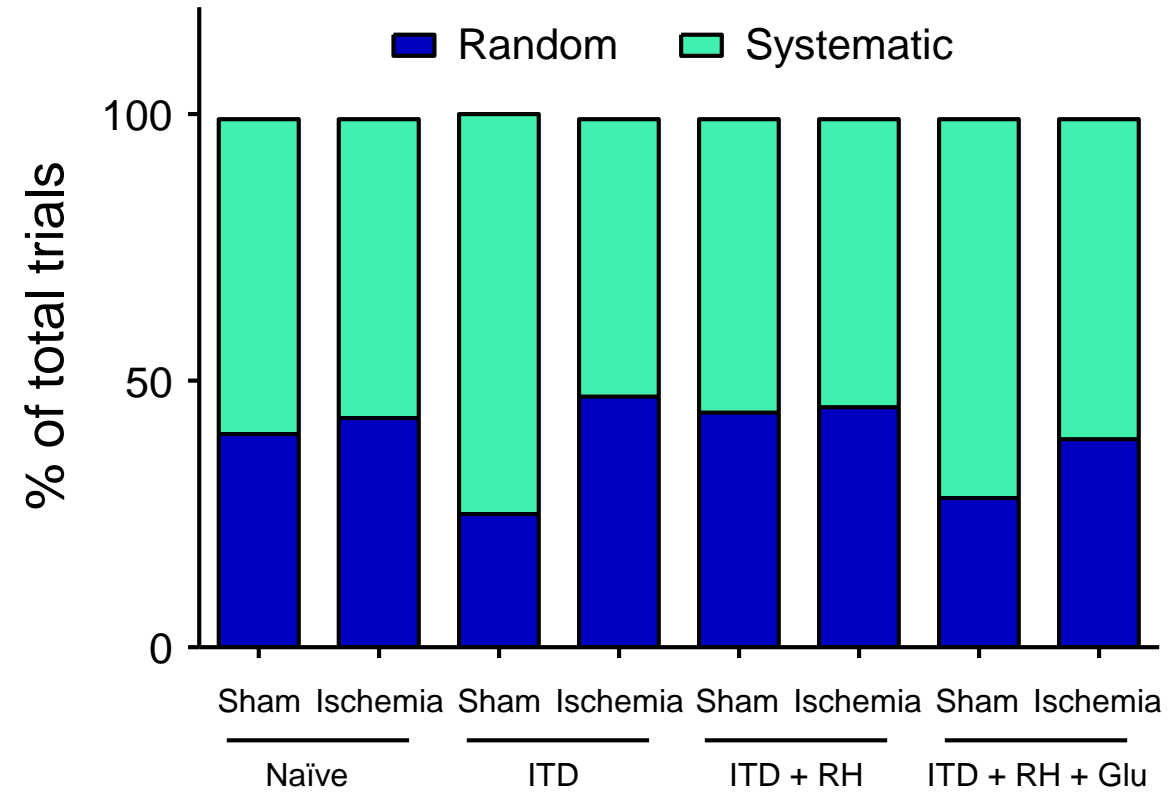

Supplement: NIHMS953775-supplement-1.pdf [file NIHMS953775-supplement-1.pdf]
